# Supplementary material for: Ground Penetrating Radar for Belowground Phenotyping of High-biomass Grasses for Soil Carbon Sequestration
Source: Research Square preprint supplement (doi:10.21203/rs.3.rs-1041672/v1), 2021-12-01
Supplement: Supplementary file 1 [file 89206b740dd020763f77fe9e.docx]

# Appendix A

**Table 6** Results of belowground biomass ANOVA

|  | DF | SS | MSE | F | Pr (>F) |  |
| --- | --- | --- | --- | --- | --- | --- |
| Layer | 2 | 2127394 | 1063697 | 6.387 | 0.00367 | ** |
| Tissue | 1 | 8074213 | 8074213 | 48.48 | 1.30E-08 | *** |
| Residuals | 44 | 7328131 | 166548 |  |  |  |
| --- |  |  |  |  |  |  |
| Significance codes: | | 0.0001*** 0.001** 0.01* | | |  |  |

**Table 7** Tukey HSD post hoc test. The results below demonstrate that both lower layers differed with the first significantly, but not with each other

| Tukey multiple comparisons of means | | | | |
| --- | --- | --- | --- | --- |
| 95% family-wise confidence | | | | |
|  |  |  |  |  |
| Fit: AOV(formula = Mass ~ Layer + Tissue) | | | | |
|  |  |  |  |  |
| Layer |  |  |  |  |
|  | difference | Lower | Upper | p adj |
| 2-1 | 489.775 | 139.811 | 839.739 | 0.004107 |
| 3-1 | 384.65 | 34.68603 | 734.614 | 0.028292 |
| 3-2 | -105.125 | -455.089 | 244.839 | 0.747961 |
|  |  |  |  |  |
| Tissue |  |  |  |  |
|  | difference | Lower | Upper | p adj |
| R – F | 820.275 | 582.8459 | 1057.704 | 0 |
